# Supplementary material for: RNA binding motif protein RBM41 promotes colorectal tumorigenesis by impeding the maturation of NDRG1 pre-mRNA
Source: Cell Death Discov. 2026 Jun 20;12:276. doi: 10.1038/s41420-026-03197-6 (PMC13283208; doi:10.1038/s41420-026-03197-6)
Supplement: Supplementary file 3 — Supplementary Tables [file 41420_2026_3197_MOESM3_ESM.xlsx]

## Sheet: Antibody
Supplementary Table S1. Antibodies used in this study
Antibody	Manufacturer	Catalog Number	Dilution Ratio
BAX	Cell Signaling	2772S	1:1000
BCL2	proteintech	12789-1-AP	1:1000
LC3B	Cell Signaling	2775S	1:1000
P62	zen-bio	R389405	1:1000
RBM41	proteintech	15784-1-AP	1:1000
NDRG1	abways	CY7079	1:1000
Anti-Flag Tag	Servicebio	GB15938-100	1:1000
GAPDH (HRP)	Servicebio	ZB15004-HRP-100	1:5000
Goat Anti-Rabbit IgG H&L (HRP)	zen-bio	511203	1:10000

## Sheet: Chemical
Supplementary Table S2. Chemicals used in this study
Inhibitor	Catalog Number	Concentration	Treatment Duration
Actinomycin D	HY-17559	5 μg/mL	0, 3, 6, 9 and 12 h
Chloroquine	HY-17589A	50 μM	24, 36, 48, 60 and 72 h
Z-VAD-FMK	HY-16658B	50 μM	24, 36, 48, 60 and 72 h
Necrostatin-1	HY-15760	20 μM	24, 36, 48, 60 and 72 h
Ferrostatin-1	HY-100579	2 μM	24, 36, 48, 60 and 72 h
5-fluorouracil	HY-90006	0.01, 0.1, 1, 10, 100 μM	48 h
Oxaliplatin	HY-17371	0.01, 0.1, 1, 10, 100 μM	48 h
Irinotecan	HY-16562	0.01, 0.1, 1, 10, 100 μM	48 h
G418	HY-17561	100 μg/mL	2 w
Puromycin	HY-B1743	1.5 μM	1 w
DMSO	HY-Y0320C	≤0.1%	As Required

## Sheet: siRNA
Supplementary Table S3. siRNAs used in this study
Names		Sequences (5’-3’)
siRBM41 #1	F	CCAUGUGGCAAAUGUUAUUTT
	R	AAUAACAUUUGCCACAUGGTT
siRBM41 #2	F	GCUACAGGUAGCACUACAGTT
	R	CUGUAGUGCUACCUGUAGCTT
siNDRG1 #1	F	GGCCUGUCAUCCUCACCUATT
	R	UAGGUGAGGAUGACAGGCCTT
siNDRG1 #2	F	CCUAACUCGAUUUGCUCUATT
	R	UAGAGCAAAUCGAGUUAGGTT

## Sheet: sgRNA
Supplementary Table S4. sgRNA Sequences for CRISPR-Cas9
Names	Sequences (5’-3’)
sgRBM41 #1	CCCAGCTGCTTCCTTCCCAA
sgRBM41 #2	CCTTGTCCCTGGAGTAATGAT
sgNDRG1 #1	CAGCTGGCTGAAATGCTTCCTGG
sgNDRG1 #2	AGGATGGACCCAAGCTCTGCCGG

## Sheet: RT-qPCR
Supplementary Table S5. Primers for RT-qPCR
Primer names	Sequences (5’-3’)
RBM41-F	CCGCGGCCTATTTACCCAA
RBM41-R	TTCACACAGCTGTTTACCCTCT
NDRG1-F	CTCCTGCAAGAGTTTGATGTCC
NDRG1-R	TCATGCCGATGTCATGGTAGG
GAPDH-F	ACCCAGAAGACTGTGGATGG
GAPDH-R	TCAGCTCAGGGATGACCTTG

## Sheet: RIP
Supplementary Table S6. Primers for RIP assays
Primer names	Sequences (5’-3’)
NDRG1-pre-mRNA-F	TGCCTGGATCGTATTGCTCC
NDRG1-pre-mRNA-R	TGTCCGGGTTCAAAGTCTGG
NDRG1-mRNA-F	GTCCTTATCAACGTGAACCCTT
NDRG1-mRNA-R	GCATTGGTCGCTCAATCTCCA
NDRG1-5'UTR-F	GGTGCTGAAGCTCGTCAGTT
NDRG1-5'UTR-R	CCTAACGCGAGGGAGAAAGG
NDRG1-intron 1-F	TTGCATAGACAAGATCGGAG
NDRG1-intron 1-R	TTTCTGCAATACAACCGAGA
NDRG1-intron 2-F	GCTTGCTTATCATTCCACAC
NDRG1-intron 2-R	GAAGACTATGTCACAGACCC
NDRG1-intron 3-F	CCTGCGAAGATAATTCCTCA
NDRG1-intron 3-R	ATCTTATCCTGACCTCTGCT
NDRG1-intron 4-F	ATGGACTGCCTGATTTTCAT
NDRG1-intron 4-R	CAGTTCCTTGTCAGAGTCAA
NDRG1-intron 5-F	CAGGTCTCTGTTTCGATAGG
NDRG1-intron 5-R	CAATTCCAATGTCAGGGAGA
NDRG1-intron 6-F	TTCCTCTTGCGTGAATGTTA
NDRG1-intron 6-R	GGTGTGGAGAGAAAAGCTAA
NDRG1-intron 7-F	CTAGAATCAGACACGGGAAG
NDRG1-intron 7-R	GGGTACAGTTGAGACCATTT
NDRG1-intron 8-F	TTACTTCTTGCAGTCCTTCC
NDRG1-intron 8-R	AGAAGCTCTAGACCTAAGGG
NDRG1-intron 9-F	TATTTGGAGACTGGTTGGTC
NDRG1-intron 9-R	TGGCTACTAAGAGCAAACTC
NDRG1-intron 10-F	TCAGCCACATCATTGCTATT
NDRG1-intron 10-R	GAGTGTTTGTTCAGATCCCT
NDRG1-intron 11-F	GGAGAAGGATGGTTGATTGT
NDRG1-intron 11-R	ATCATTACTGGTGGAAACCC
NDRG1-intron 12-F	TCACCTCTTATTTGGGAAGC
NDRG1-intron 12-R	ATAGCCCCTAAGTCTTCCAT
NDRG1-intron 13-F	CGTCAGTCTAATGTGCTGAG
NDRG1-intron 13-R	CCAGTACCCTTCCTAAATGG
NDRG1-intron 14-F	ACTGATCCCTTCAATTTCCC
NDRG1-intron 14-R	CCAGGGTTACATCTGTTCTC
NDRG1-intron 15-F	ATTGTTCCTCCTCATTCCAC
NDRG1-intron 15-R	GGCTATTCGTTGTCATCTCT
NDRG1-3'UTR-F	GAAACAAAATCCTTTTCTCA
NDRG1-3'UTR-R	TAAGGAATGCAAAACAAATC

## Sheet: RNA pull-down
Supplementary Table S7. Primers for RNA pull-down assays
Primer names		Sequences (5’-3’)
Trunc #1	F	TAATACGACTCACTATAGGGTCCATGGAGGTCTCCTGCT
	R	AGGTGCCTGCATGTCACTAT
Trunc #2	F	TAATACGACTCACTATAGGGTTTTCTCATTTGGGGAGGGGG
	R	AGCTGTGGAATGTTGCCCTC
Trunc #3	F	TAATACGACTCACTATAGGGCTTGTTCAGGGAGAAGATCATTTAG
	R	GCCCAGAAACGTCAGTGGT
Trunc #4	F	TAATACGACTCACTATAGGGGGAGCGGTGGCTGAGAAAAT
	R	CTCCTCTGGAAAGACTTGTGC
Trunc #4-1	F	TAATACGACTCACTATAGGGGGAGCGGTGGCTGAGAAAAT
	R	AGTCATTGCCTCTCACGCCAC
Trunc #4-2	F	TAATACGACTCACTATAGGGGATTTCTGGGACCCCGCAGTT
	R	CTCCTCTGGAAAGACTTGTGC
Trunc #4-2-1		TAATACGACTCACTATAGGGGATTTCTGGGACCCCGCAGTTGGGAGGAGGAAGTAGTCCAGCCTTCCAGGTGGCGTGAGAGGCAATGACTCGTTACCTGCCGCCCATCACCTTGGAGGCC
Trunc #4-2-2		TAATACGACTCACTATAGGGAAGTAGTCCAGCCTTCCAGGTGGCGTGAGAGGCAATGACTCGTTACCTGCCGCCCATCACCTTGGAGGCCTTCCCTGGCCTTGAGTAGAAAAGTCGGGGA
Trunc #4-2-3		TAATACGACTCACTATAGGGGGCAATGACTCGTTACCTGCCGCCCATCACCTTGGAGGCCTTCCCTGGCCTTGAGTAGAAAAGTCGGGGATCGGGGCAAGAGAGGCTGAGTACGGATGGG
Trunc #4-2-4		TAATACGACTCACTATAGGGCTTGGAGGCCTTCCCTGGCCTTGAGTAGAAAAGTCGGGGATCGGGGCAAGAGAGGCTGAGTACGGATGGGAAACTATTGTGCACAAGTCTTTCCAGAGGAG
WT		TAATACGACTCACTATAGGGATTTCTGGGACCCCGCAGTTGGGAGGAGGAAGTAGTCCAGCCTTCCAGGTGGCGTGAGAGGCAATGACTCGTTACCTGCCGCCCATCACCTTGGAGGCC
M1		TAATACGACTCACTATAGGGATTTCTGGGACCCCGCAGTTGGGAGGAGGAAGTAGTCCAGCCTTCCAGGTGGCGTGAGAGGCAATGACTCGTTACCTGCCGCCCATCACAGGTGAGGCC
M2		TAATACGACTCACTATAGGGATTTCTGGGACCCCGCAGTTGGGAGGAGGAAGTAGTCCAGCCTTCCAGGTGGCGTGAGAGGCAATGACTCGTTACCTGCCGCCCATCACCTTTTCTTCC
M3		TAATACGACTCACTATAGGGATTTCTGGGACCCCGCAGTTGGGAGGAGGAAGTAGTCCAGCCTTCCAGGTGGCGTGAGAGGCAATGACTCGTTACCTGCCGCCCATCACCTTGGATTAA
M4		TAATACGACTCACTATAGGGATTTCTGGGACCCCGCAGTTGGGAGGAGGAAGTAGTCCAGCCTTCCAGGTGGCGTGAGAGGCAATGACTCGTTACCTGCCGCCCATCACAGGTTCTTAA
M'1		TAATACGACTCACTATAGGGATTTCTGGGACCCCGCAGTTGGGAGGAGGAAGTAGTCCAGCCTTCCAGGTGGCGTGAGAGTACCTGACTCGTTACCTGCCGCCCATCACCTTGGAGGCC
M'2		TAATACGACTCACTATAGGGATTTCTGGGACCCCGCAGTTGGGAGGAGGAAGTAGTCCAGCCTTCCAGGTGGCGTGAGAGGCACGTCCTCGTTACCTGCCGCCCATCACCTTGGAGGCC
M'3		TAATACGACTCACTATAGGGATTTCTGGGACCCCGCAGTTGGGAGGAGGAAGTAGTCCAGCCTTCCAGGTGGCGTGAGAGTACCGTCCTCGTTACCTGCCGCCCATCACCTTGGAGGCC
